# Supplementary material for: Volume Analysis to Predict the Long-Term Evolution of Residual Aortic Dissection after Type A Repair
Source: MDPI journal article supplement (doi:10.3390/jcdd9100349), 2022-10-12
Supplement: s1 [file s1]

## Supplemental figure legends

True lumen

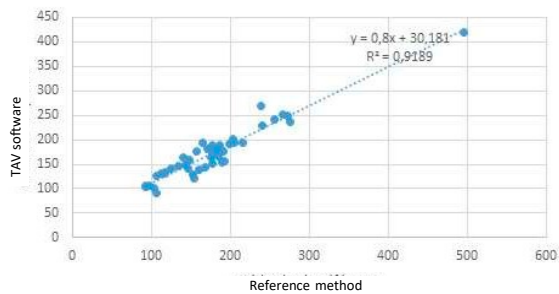

False lumen

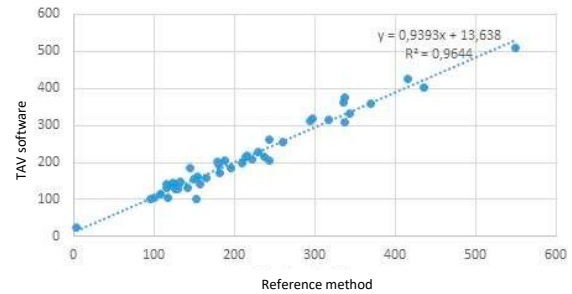

**Scheme S1.** Validation of the custom application TAV results.

Comparison of the results obtained using a reference method by another observer [23–25].

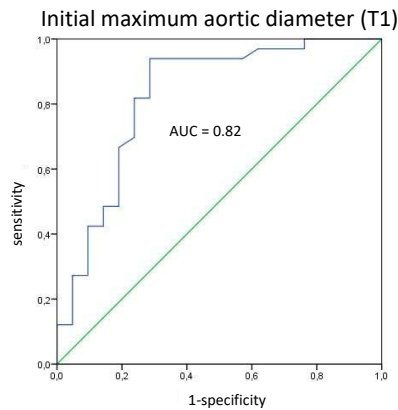

aortic diameter evolution at 3 months (blue) and 1 year (green)

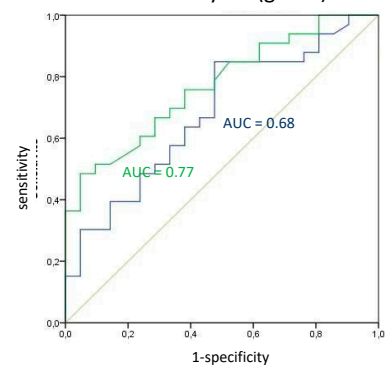

**Scheme S2.** ROC curve showing the sensitivity and specificity of the total aortic diameter measurement at T1.

ROC curve showing the sensitivity and specificity of the aortic diameter evolution at 3 months (blue) and 1 year (green).

## References

23. England, A.; Fisher, R.; McWilliams, R.; Torella, F. Estimating the error of CT-based measurements of aortic lumen volume used in endovascular planning. *Radiography* 2017, 23, 287–291.
24. Concistrè, G.; Casali, G.; Santaniello, E.; Montalto, A.; Fiorani, B.; Dell'Aquila, A.; Musumeci, F. Reoperation after surgical correction of acute type A aortic dissection: Risk factor analysis. *Ann. Thorac. Surg.* 2012, 93, 450–455.
25. Kimura, N.; Tanaka, M.; Kawahito, K.; Yamaguchi, A.; Ino, T.; Adachi, H. Influence of patent false lumen on long-term outcome after surgery for acute type A aortic dissection. *J. Thorac. Cardiovasc. Surg.* 2008, 136, 1160–1166, 1166 e1–e3.
